# Supplementary material for: β-sitosterol isolated from the leaves of Trema orientalis (Cannabaceae) promotes viability and proliferation of BF-2 cells
Source: PeerJ journal article supplement (doi:10.7717/peerj.16774), 2024-01-23

bota-tiwtawat-01, 18 mg

Current Data Parameters  
NAME bota-tiwtawat-01  
EXPNO 1  
PROCNO 1

F2 - Acquisition Parameters  
Date\_ 20191113  
Time 17.05  
INSTRUM spect  
PROBHD 5 mm CPPBBO BB  
PULPROG zg30  
TD 32768  
SOLVENT CDCl3  
NS 144  
DS 0  
SWH 6393.862 Hz  
FIDRES 0.195125 Hz  
AQ 2.5624576 sec  
RG 114  
DW 78.200 usec  
DE 10.00 usec  
TE 299.1 K  
D1 1.00000000 sec  
TD0 1

===== CHANNEL f1 =====  
SFO1 400.1328009 MHz  
NUC1 1H  
P1 12.00 usec  
PLW1 9.00000000 W

F2 - Processing parameters  
SI 32768  
SF 400.1300099 MHz  
WDW GM  
SSB 0  
LB -0.30 Hz  
GB 0.3  
PC 1.00

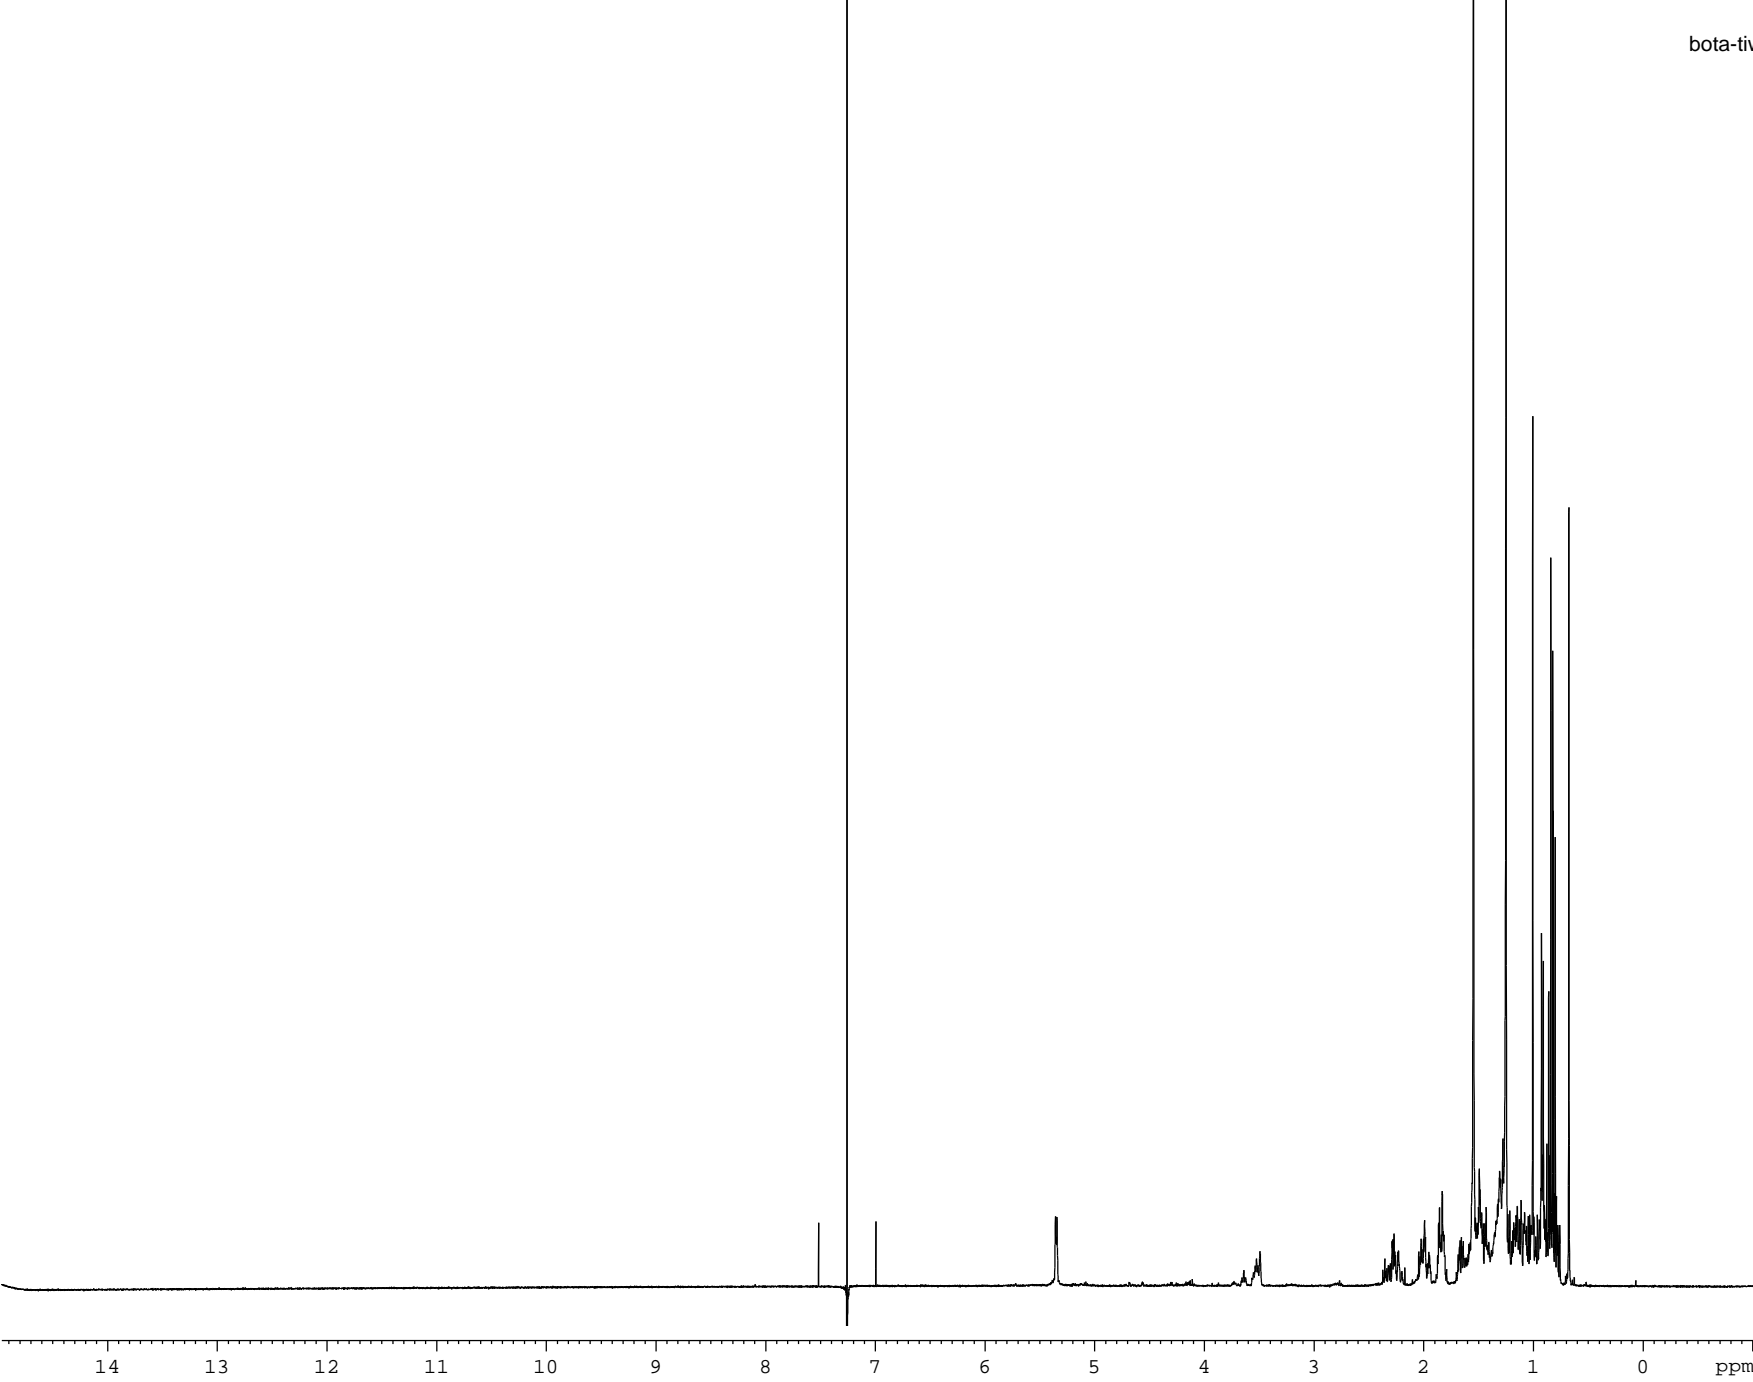

bota-tiwtawat-01, 18 mg

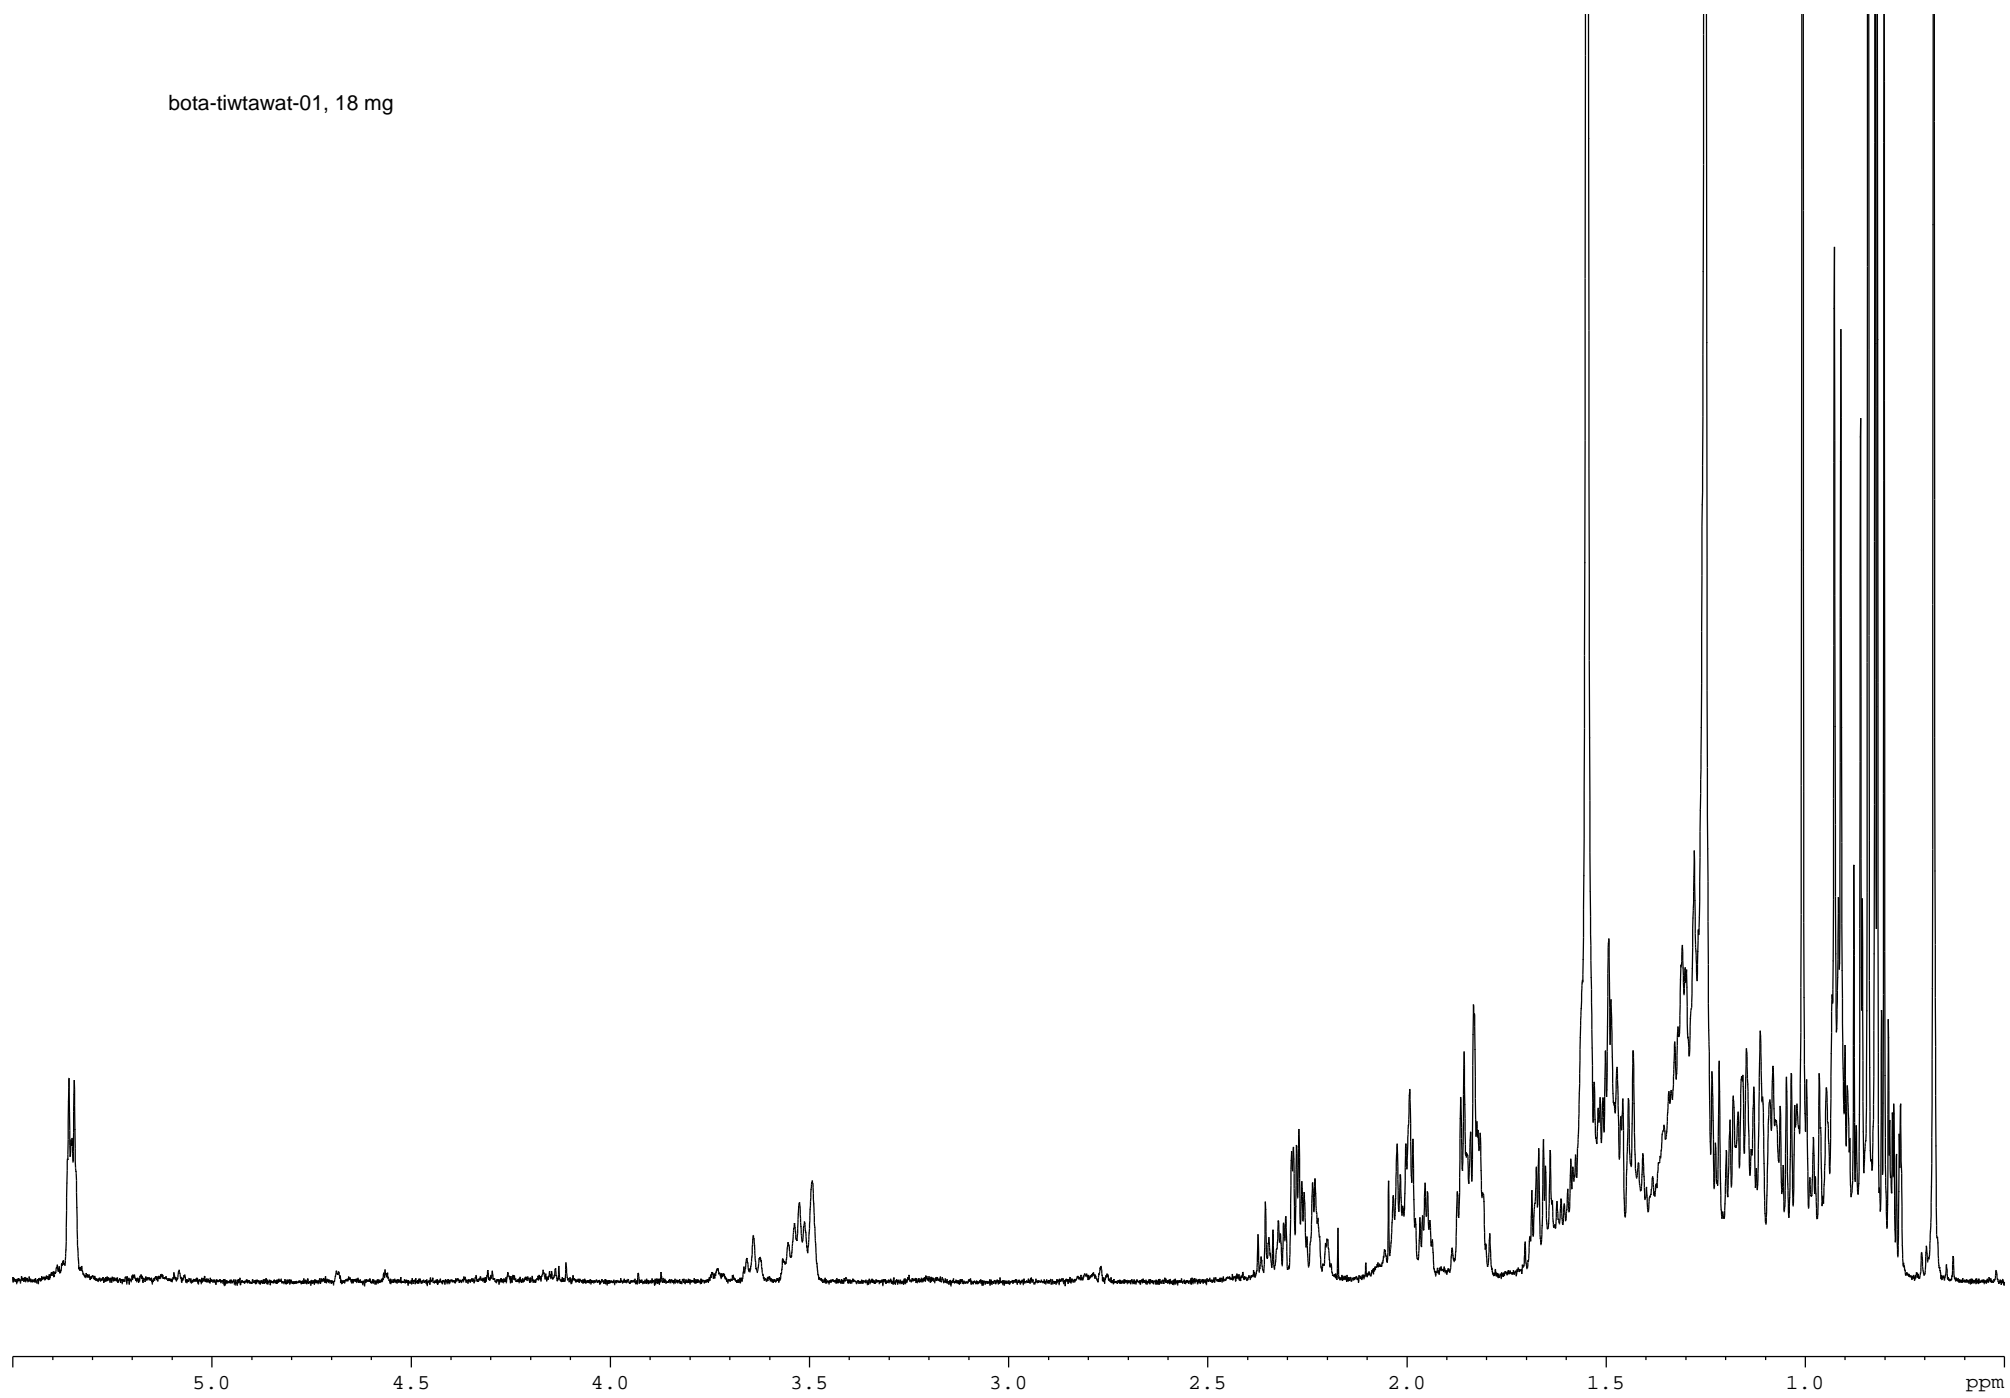

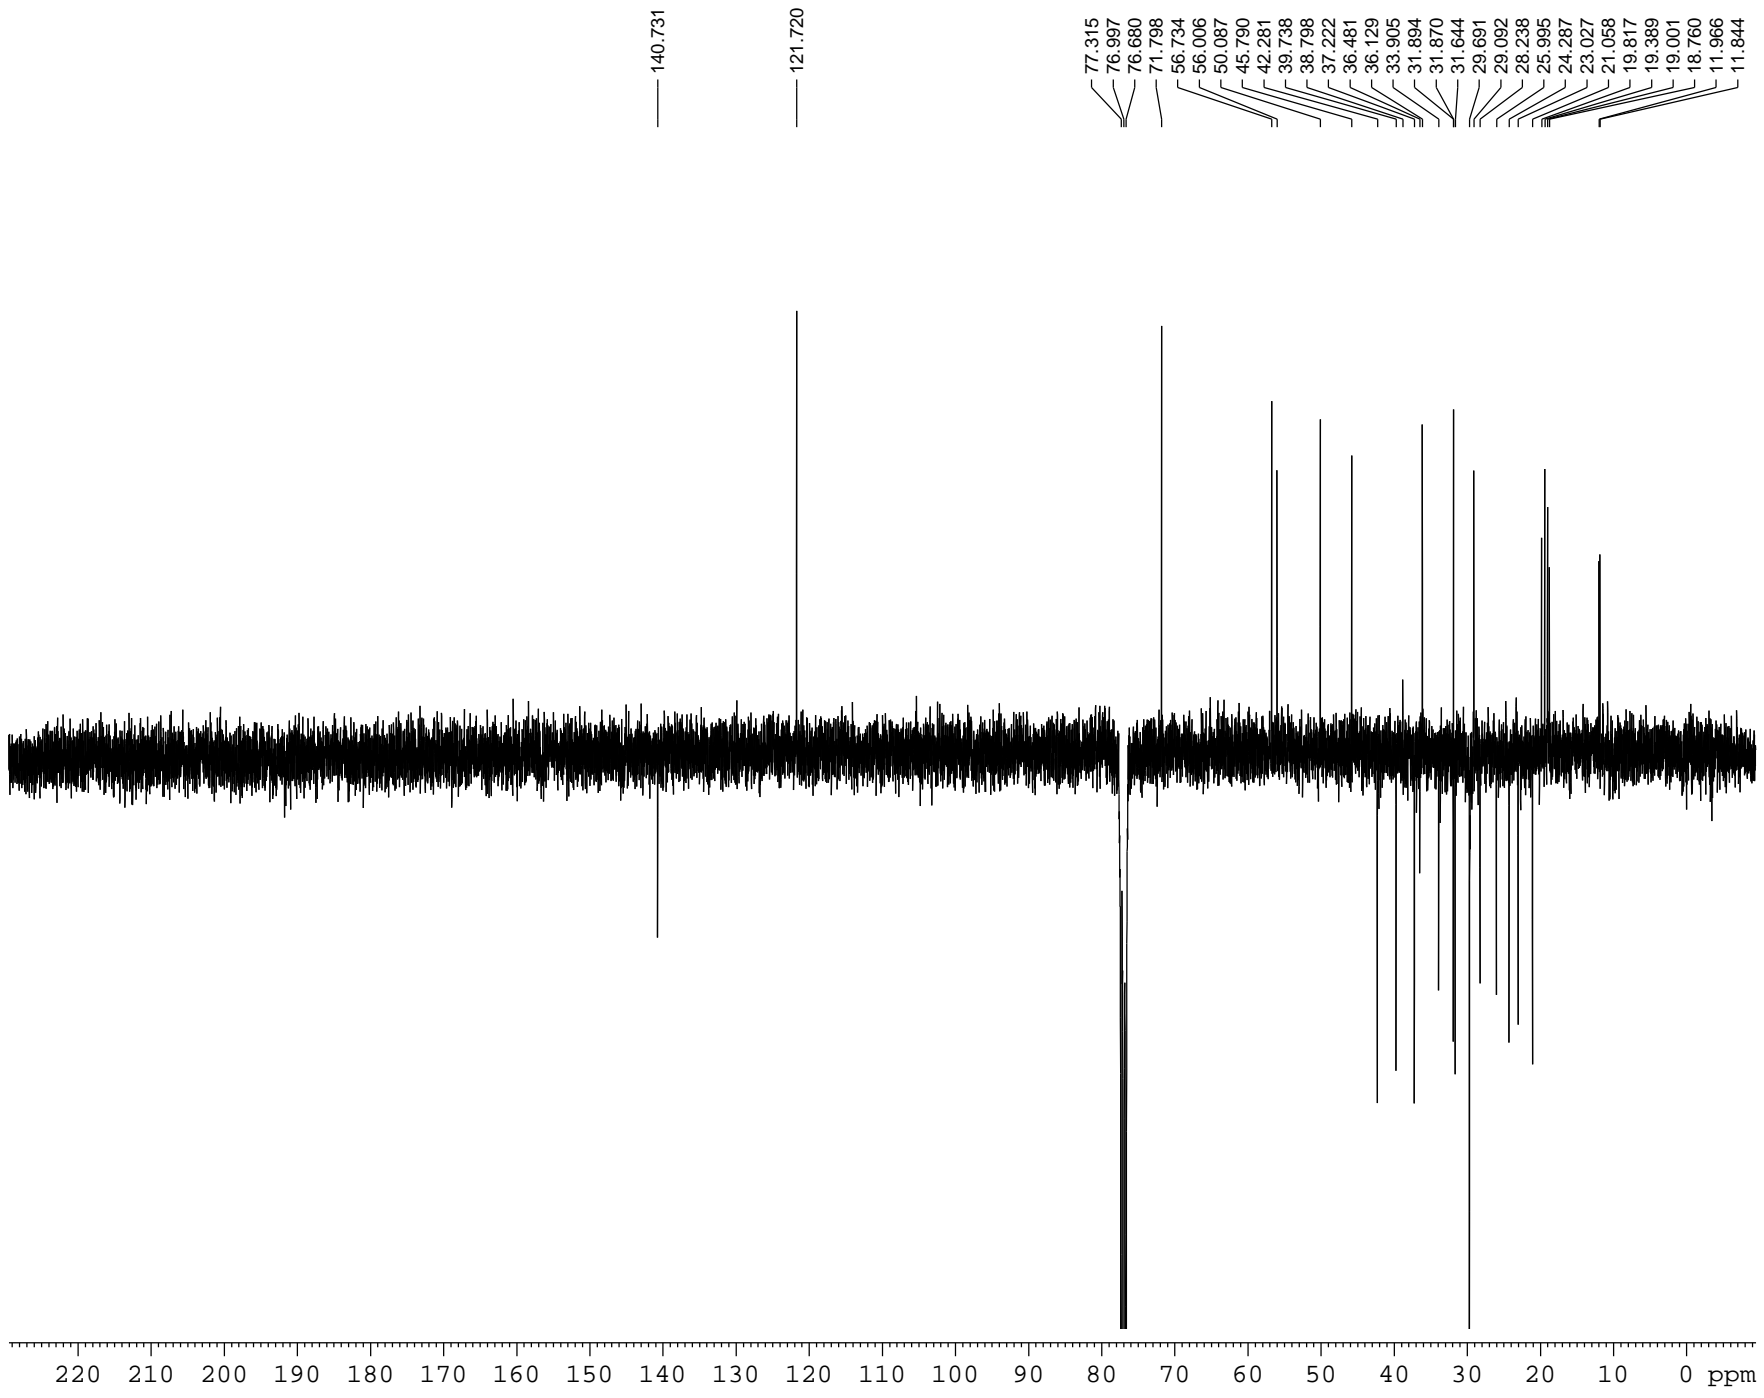

bota-tiwtawat-01, 18 mg (??)  
C-13 jmod

```

Current Data Parameters
NAME      bota-tiwtawat-01
EXPNO     5
PROCNO    1

F2 - Acquisition Parameters
Date_     20191114
Time      10.23
INSTRUM   spect
PROBHD    5 mm CPPBBO BB
PULPROG   jmod
TD         65536
SOLVENT   CDC13
NS         10500
DS         0
SWH        24038.461 Hz
FIDRES     0.366798 Hz
AQ         1.3631488 sec
RG         2050
DW         20.800 usec
DE         18.000 usec
TE         299.4 K
CNST2     145.0000000
CNST11    1.0000000
D1         2.00000000 sec
D20       0.00689655 sec
TD0        1

===== CHANNEL f1 =====
SFO1      100.6238364 MHz
NUC1       13C
P1         10.80 usec
P2         21.60 usec
PLW1       32.00000000 W

===== CHANNEL f2 =====
SFO2      400.1320007 MHz
NUC2       1H
PCPD2     waltz16
PLW2      80.00 usec
PLW12     9.00000000 W
PLW12     0.20250000 W

F2 - Processing parameters
SI         32768
SF         100.6127719 MHz
WDW        EM
SSB        0
LB         1.00 Hz
GB         0
PC         1.40

```

bota-tiwtawat-01, 18 mg (??)  
C-13 jmod

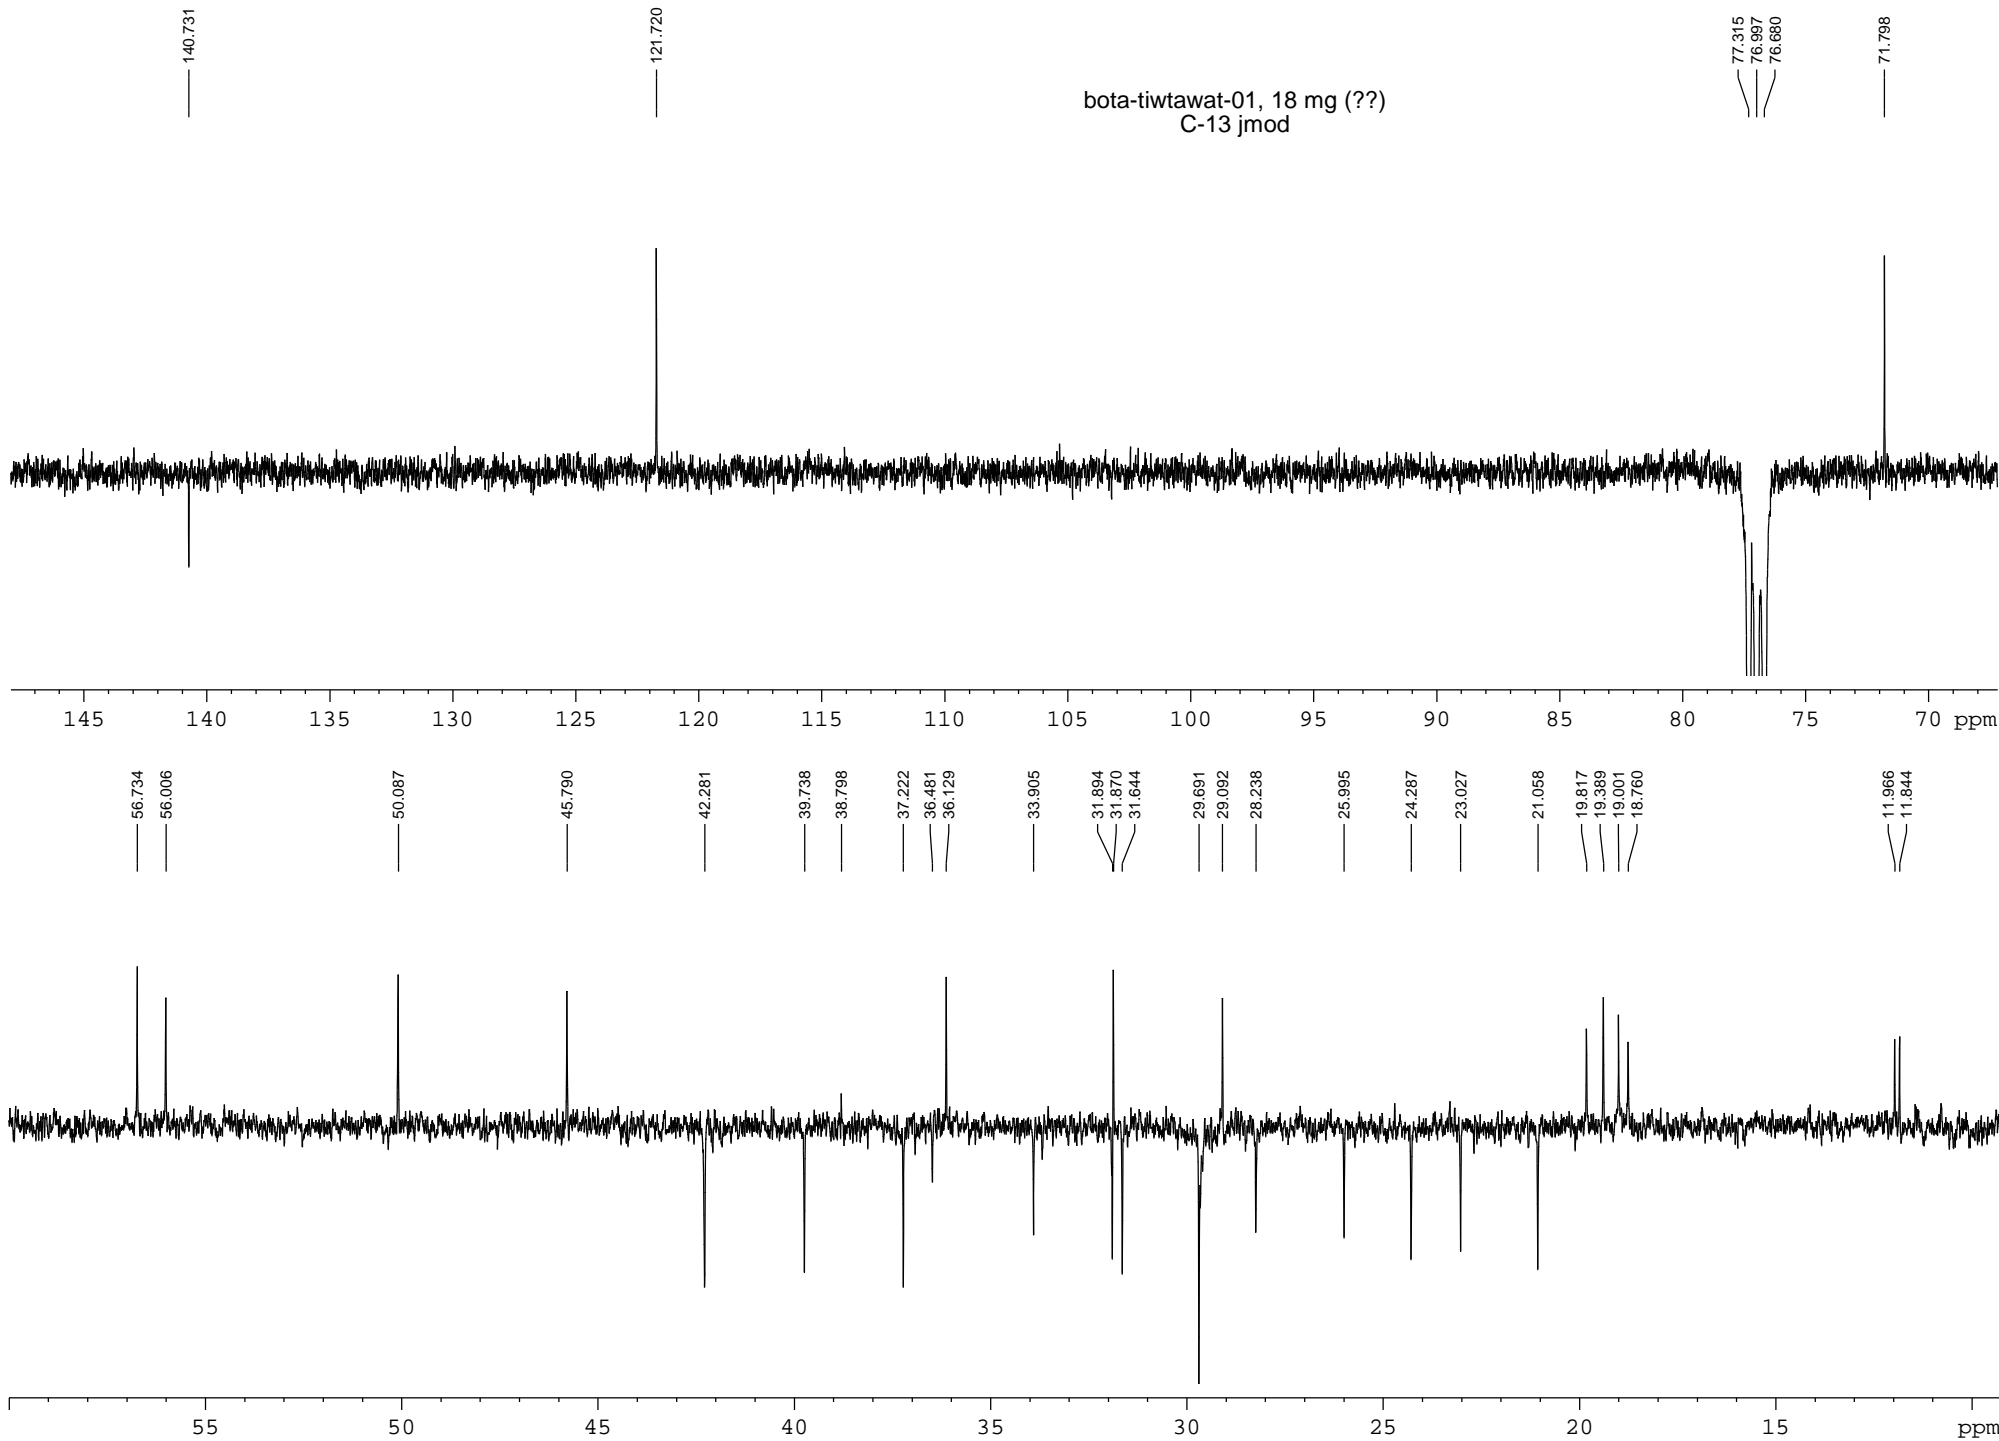

bota-tiwtawat-01, 18 mg

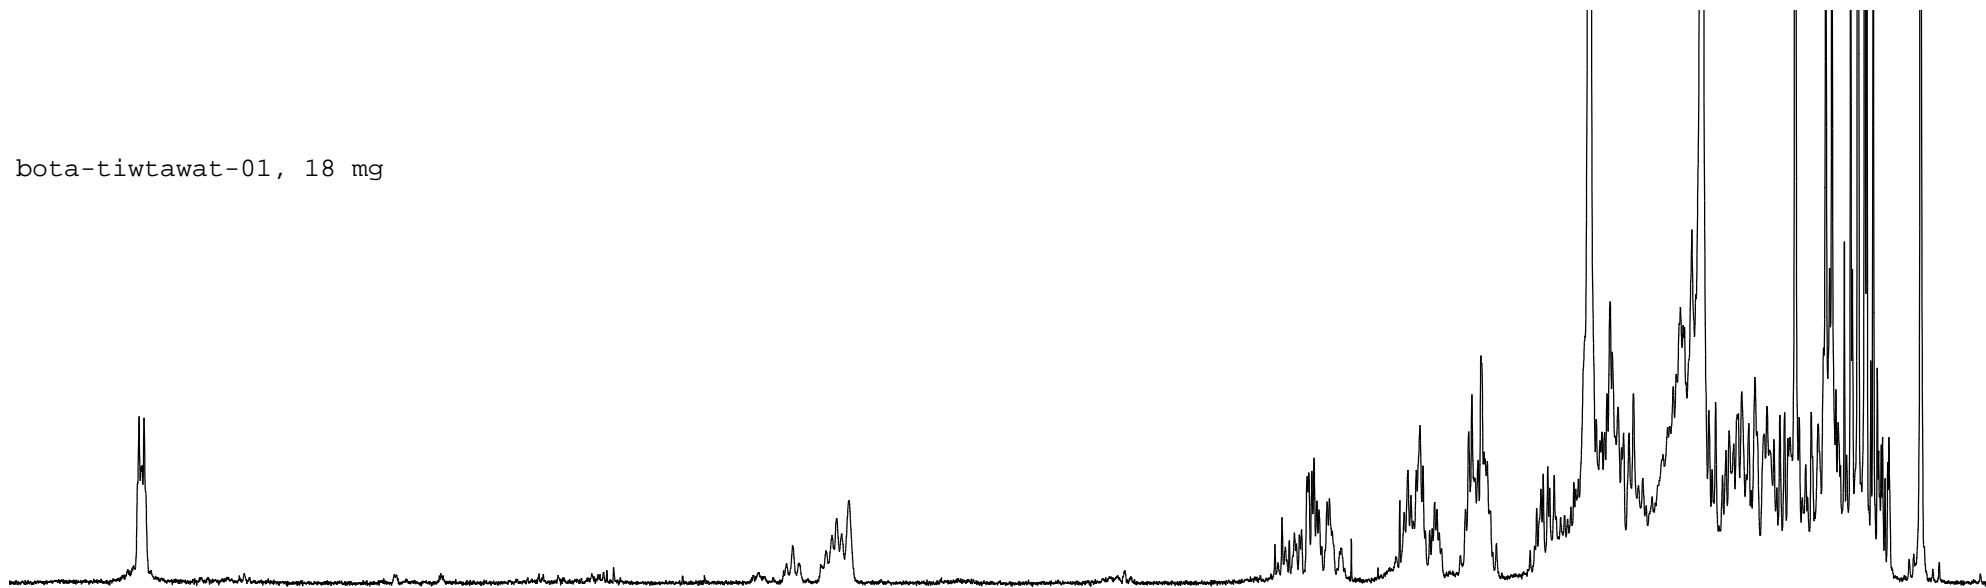

b-sitosterol + stigmasterol

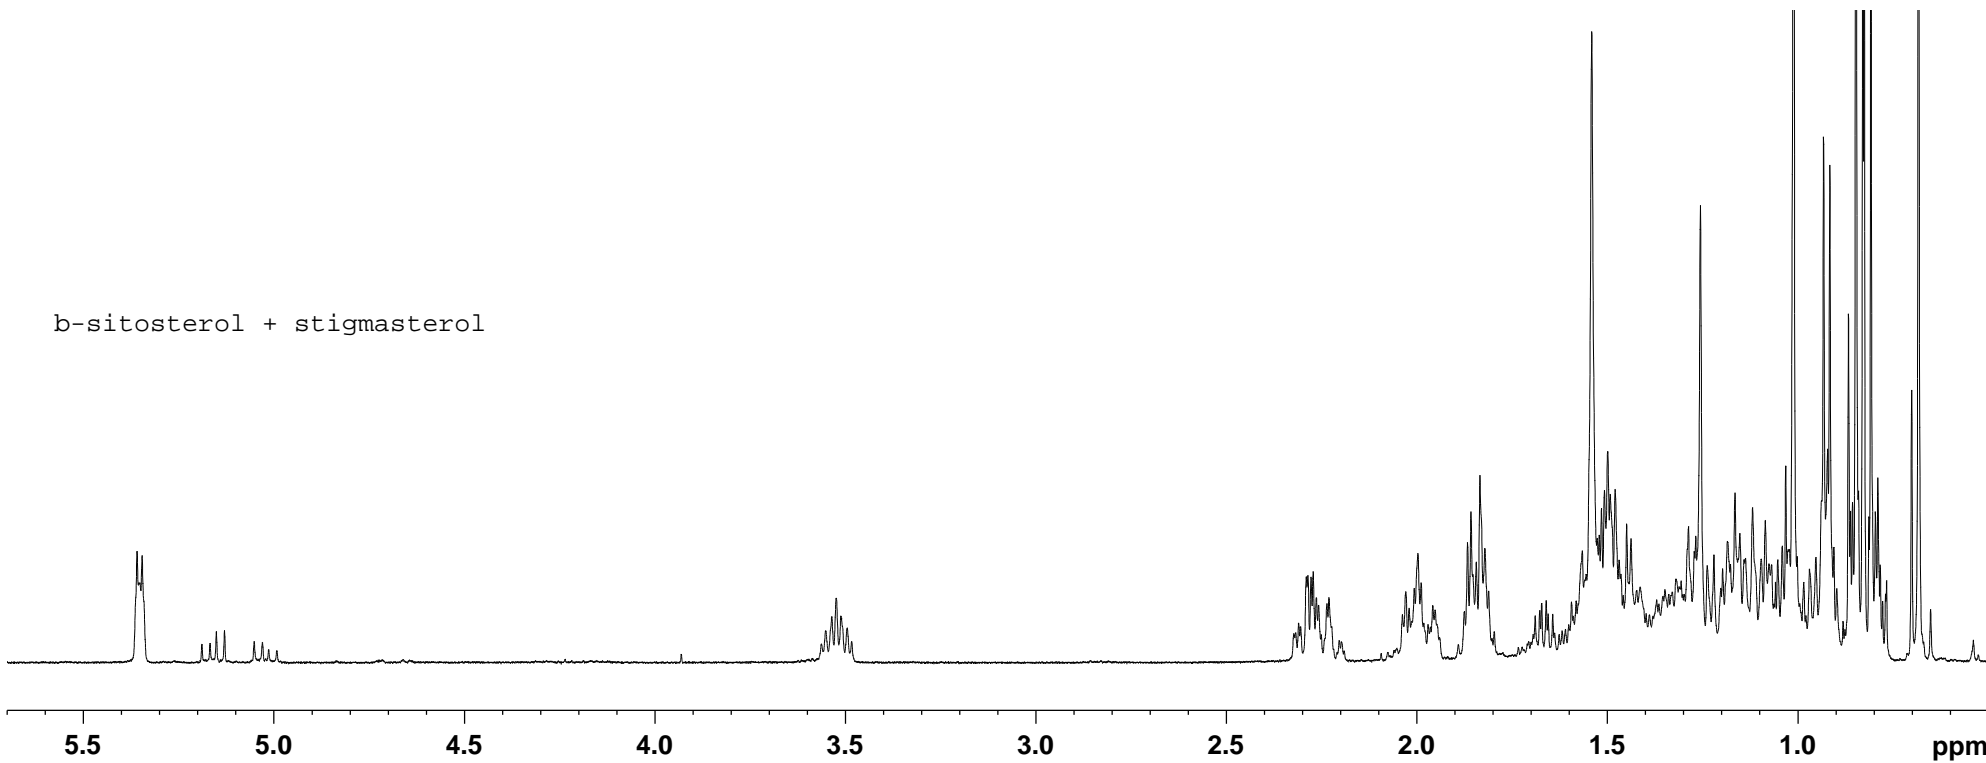

bota-tiwtawat-01, 18 mg

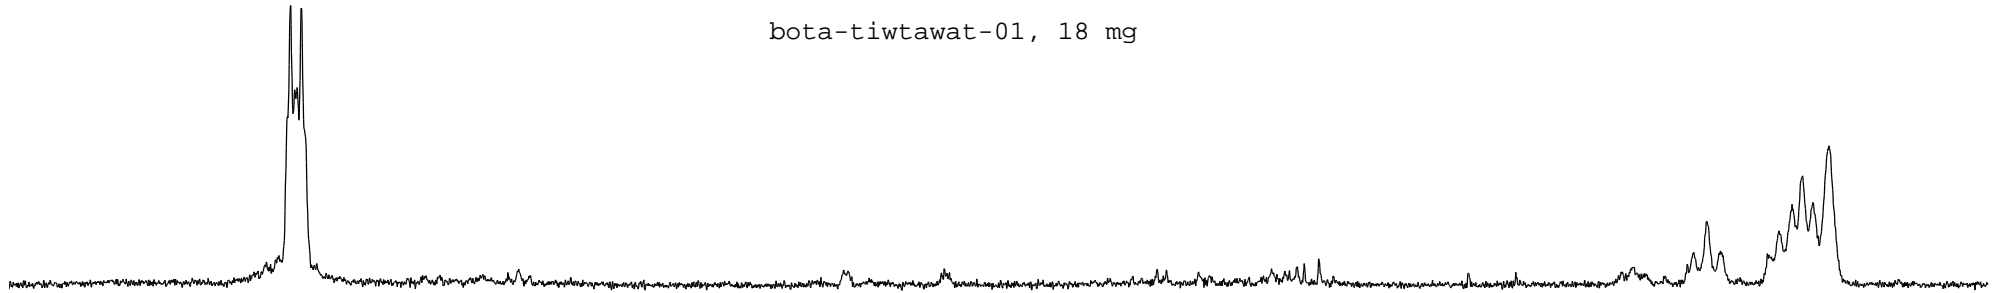

b-sitosterol + stigmasterol

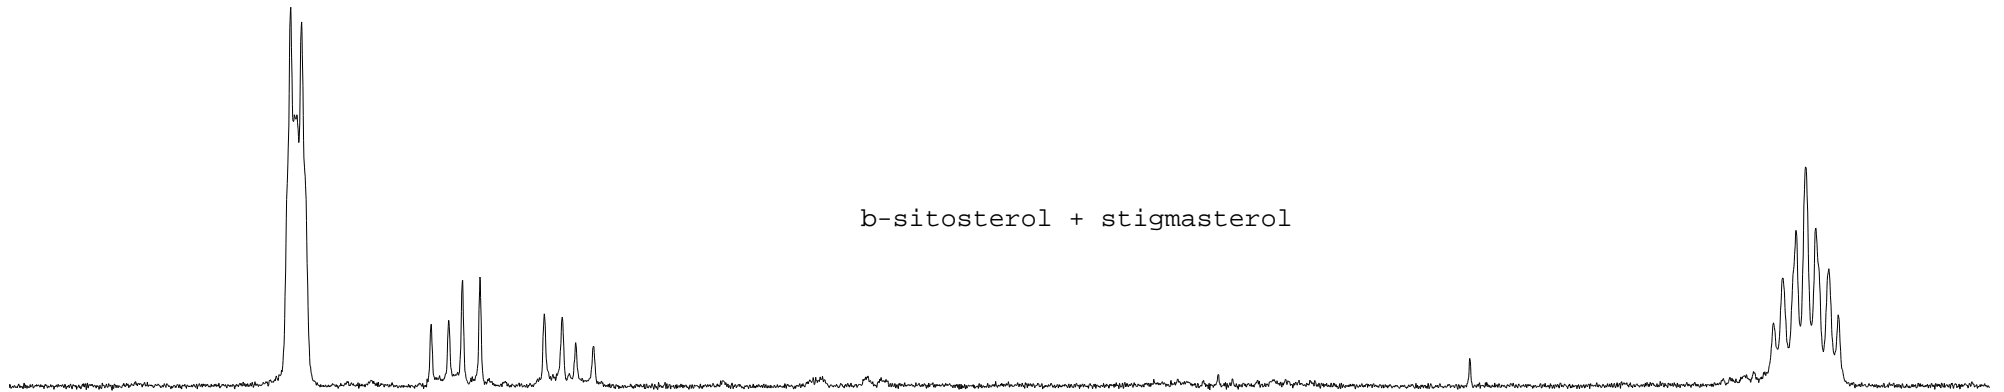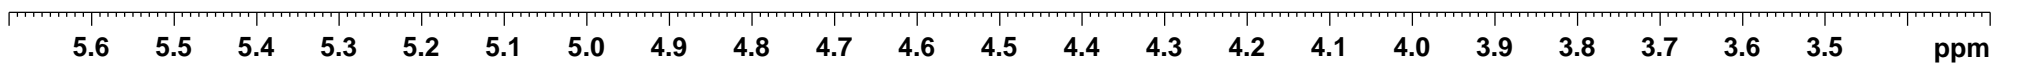

bota-tiwtawat-01, 18 mg

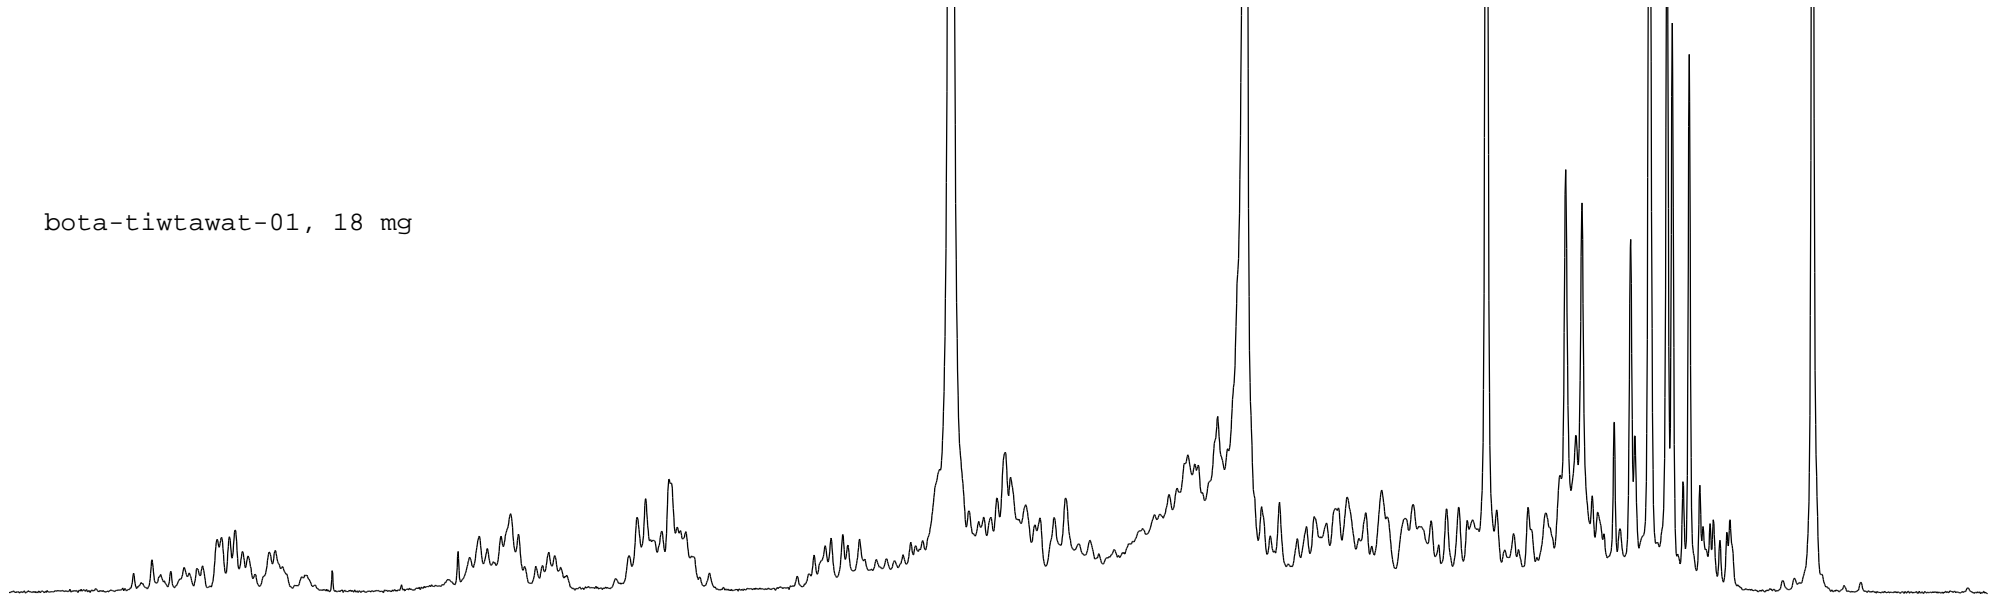

osterol + stigmasterol

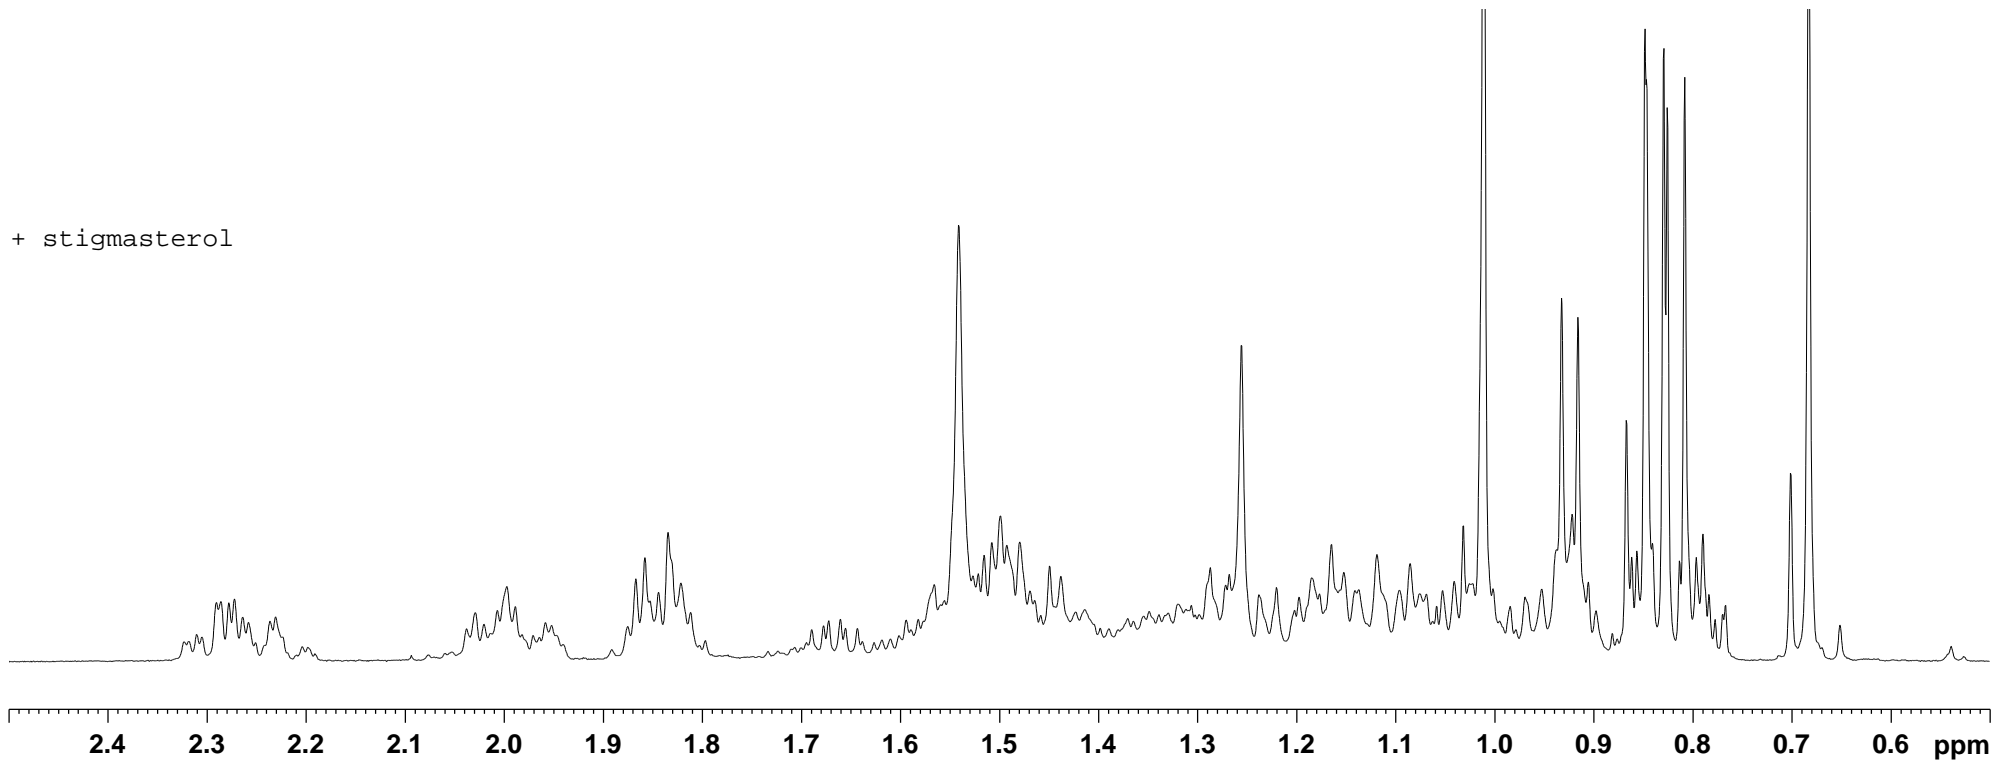

b-sitosterol + stigmasterol  
13C jmod

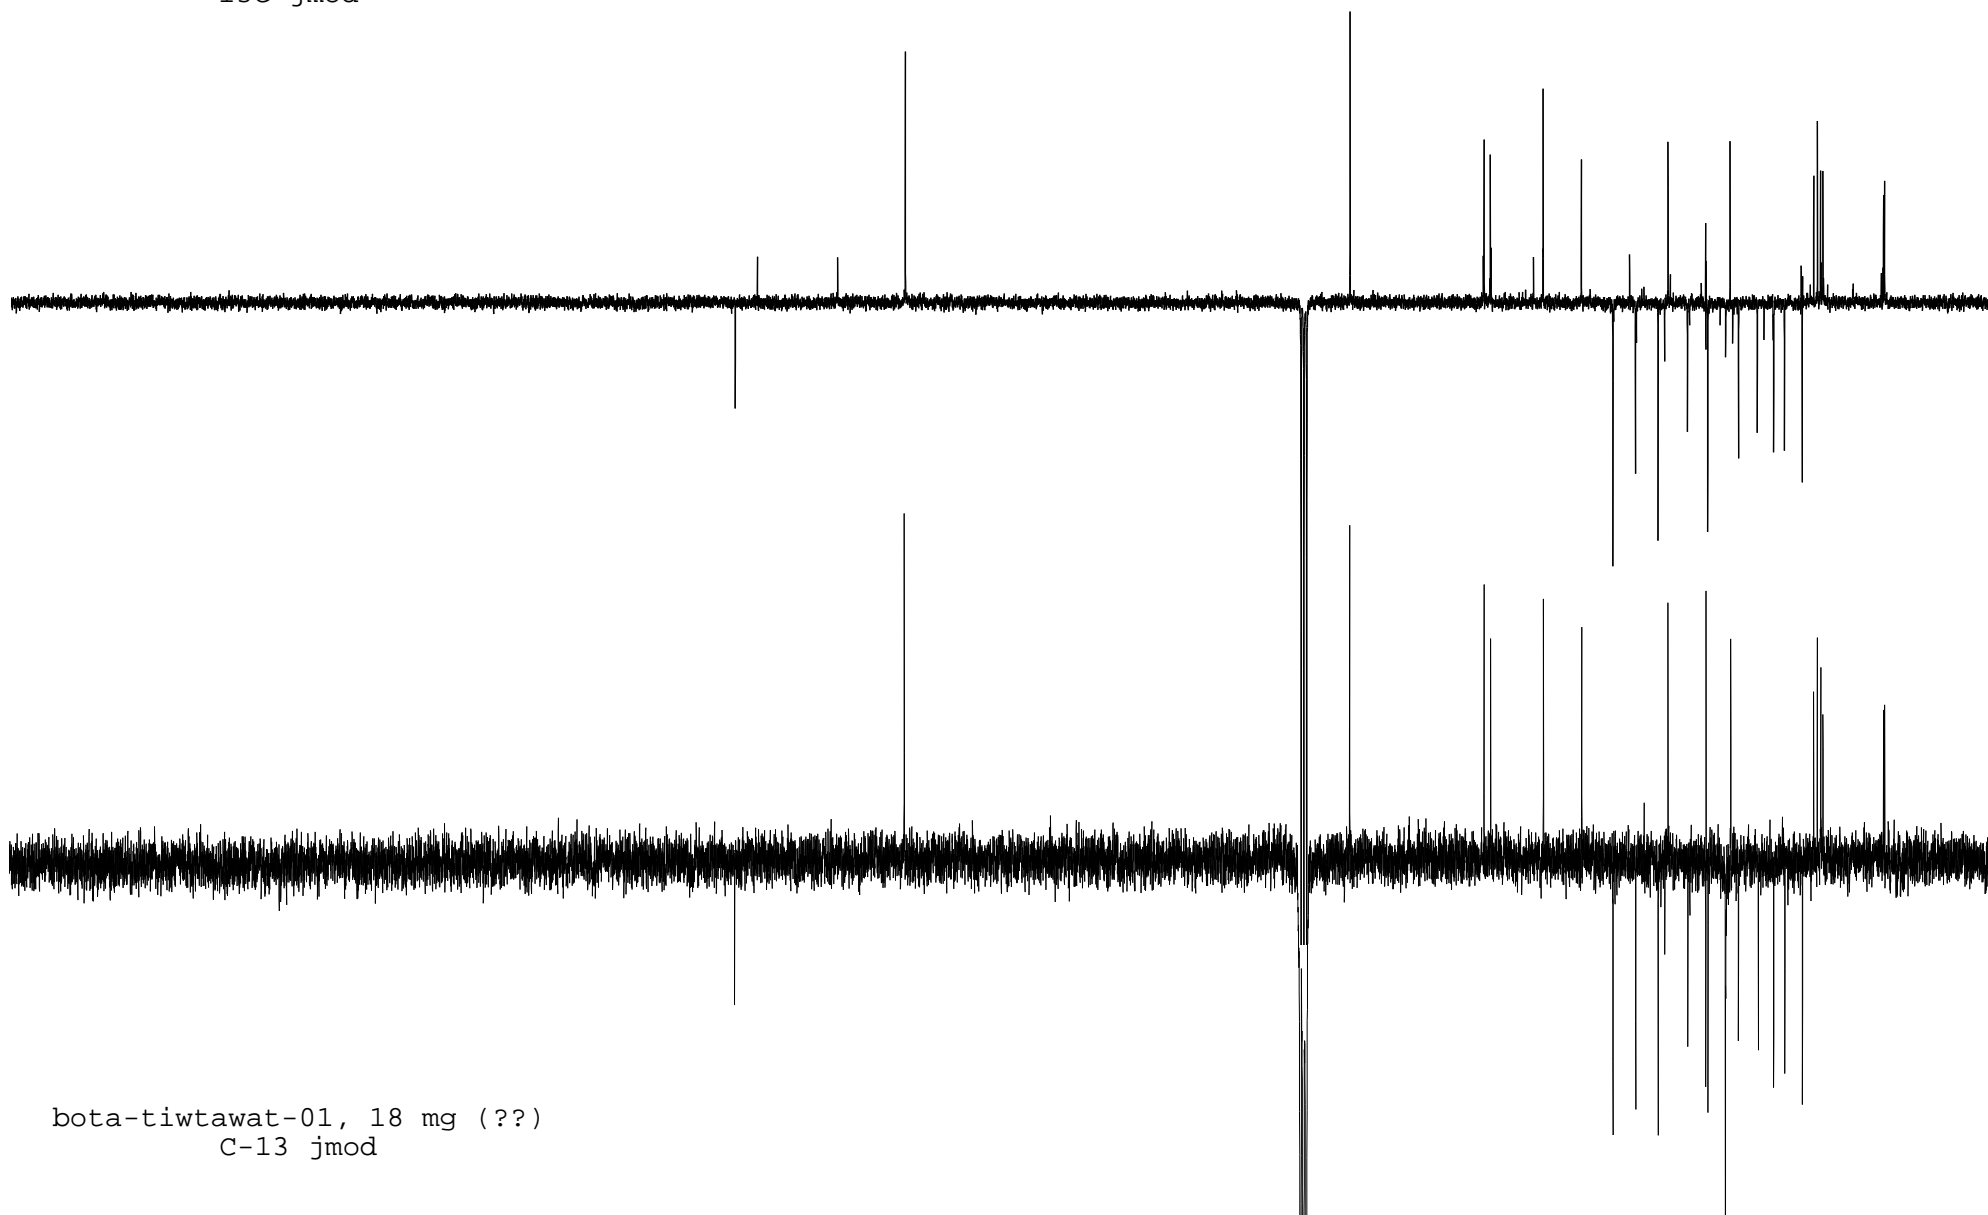

bota-tiwtawat-01, 18 mg (??)  
C-13 jmod

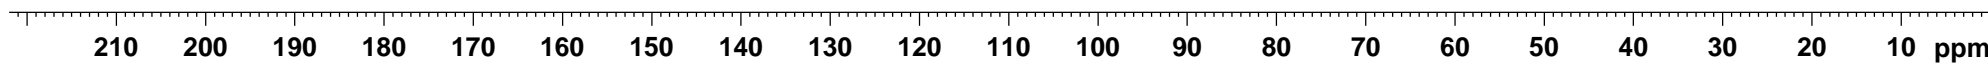



b-sitosterol + stigmasterol  
13C jmod

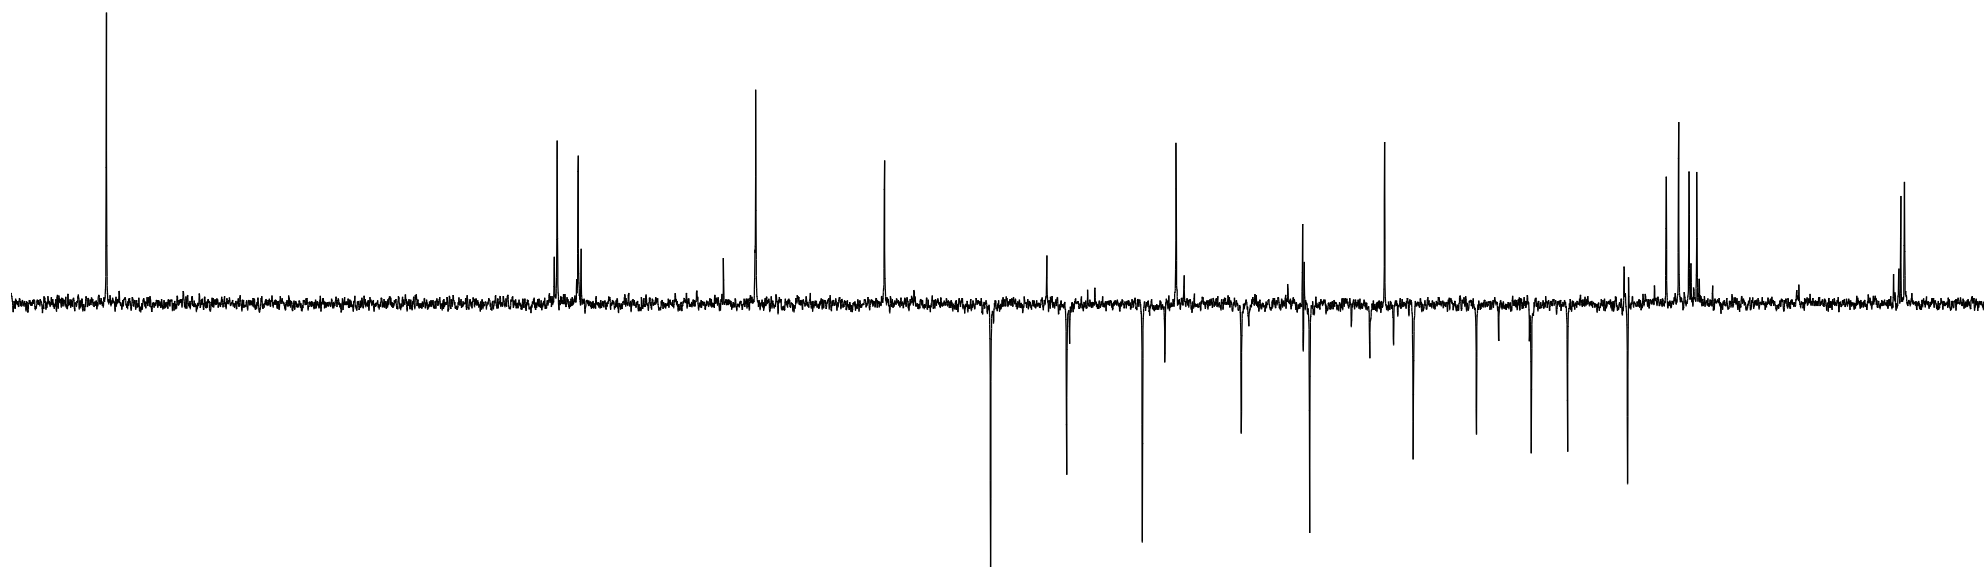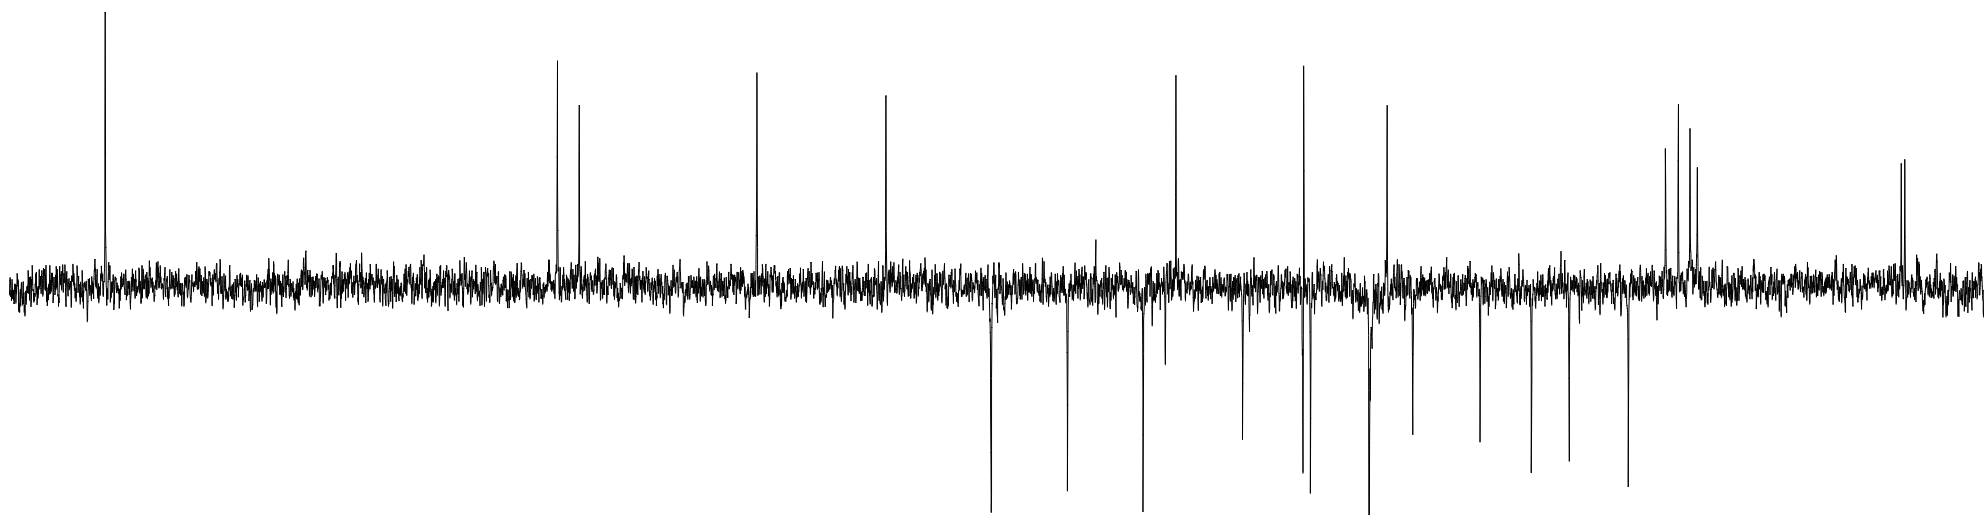

bota-tiwtawat-01, 18 mg (??)  
C-13 jmod

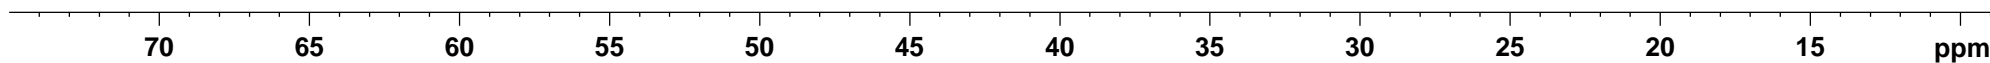

Supplement: Supplement_1.pdf [file Supplement_1.pdf]
