# Supplementary material for: β-sitosterol isolated from the leaves of Trema orientalis (Cannabaceae) promotes viability and proliferation of BF-2 cells
Source: PeerJ. 2024 Jan 23;12:e16774. doi: 10.7717/peerj.16774 (PMC10812590; doi:10.7717/peerj.16774)
Supplement: Supplemental Information 2 [file peerj-12-16774-s002.xlsx]

## Sheet: Pure compound 3 replicates
β-sitosterol
Absorbance (abs)	1	2	3	4	5	6	7	8	9	10	11	12		mean (abs)	1				mean (abs)	2				mean (abs)	β-sitosterol
A	0.193	0.179	0.174		0.251	0.266	0.265		0.1	0.107	0.096		0	0.182	109.066	97.5275	93.4066		0.260667	95.1586	102.671	102.17		0.101	97.5806	114.516	87.9032
B	0.217	0.198	0.204		0.261	0.264	0.278		0.133	0.128	0.147		0.1	0.206333	128.846	113.187	118.132		0.267667	100.167	101.669	108.681		0.136	177.419	165.323	211.29
C	0.221	0.241	0.242		0.274	0.264	0.273		0.139	0.12	0.131		1	0.234667	132.143	148.626	149.451		0.270333	106.678	101.669	106.177		0.13	191.935	145.968	172.581
D	0.22	0.225	0.237		0.227	0.215	0.217		0.108	0.101	0.109		10	0.227333	131.319	135.44	145.33		0.219667	83.1386	77.1285	78.1302		0.106	116.935	100	119.355
E	0.081	0.076	0.103		0.074	0.078	0.072		0.078	0.078	0.104		100	0.0866667	16.7582	12.6374	34.8901		0.0746667	6.51085	8.51419	5.50918		0.0866667	44.3548	44.3548	107.258
F	0.084	0.083	0.077		0.081	0.117	0.096		0.066	0.068	0.067		DMSO	0.0813333	19.2308	18.4066	13.4615		0.098	10.0167	28.0467	17.5292		0.067	15.3226	20.1613	17.7419
G	0.061	0.061	0.06		0.064	0.06	0.059		0.059	0.06	0.06		blank	0.0606667					0.061					0.0596667
H
																													1		2		β-sitosterol
Absorbance (abs)	1	2	3	4	5	6	7	8	9	10	11	12		mean (abs)	1				mean (abs)	2				mean (abs)	β-sitosterol				%cell via	sd (abs)	%cell via	sd (abs)	% cell viability	sd (abs)
A	0.228	0.215	0.287		0.251	0.233	0.23		0.165	0.17	0.178		0	0.243333	92.1368	85.4701	122.393		0.238	106.915	97.3404	95.7447		0.171	95.082	99.1803	105.738	0	100	0.0352247	100	0.0177255	100	0.0546339
B	0.347	0.386	0.305		0.285	0.237	0.229		0.189	0.175	0.197		0.1	0.346	153.162	173.162	131.624		0.250333	125	99.4681	95.2128		0.187	114.754	103.279	121.311	0.1	130.818	0.0644787	112.466	0.0240156	140.193	0.0577778
C	0.286	0.31	0.266		0.263	0.308	0.299		0.325	0.328	0.312		1	0.287333	121.88	134.188	111.624		0.29	113.298	137.234	132.447		0.321667	226.23	228.689	215.574	1	134.258	0.0361528	126.705	0.0263808	189.663	0.107228
D	0.249	0.254	0.221		0.297	0.248	0.225		0.204	0.194	0.199		10	0.241333	102.906	105.47	88.547		0.256667	131.383	105.319	93.0851		0.199	127.049	118.852	122.951	10	118.695	0.023635	98.1258	0.0256894	114.884	0.0611019
E	0.076	0.076	0.076		0.079	0.075	0.082		0.074	0.078	0.08		100	0.076	14.188	14.188	14.188		0.0786667	15.4255	13.2979	17.0213		0.0773333	20.4918	23.7705	25.4098	100	17.4976	0.00884747	12.8163	0.003444	36.8602	0.00925263
F	0.074	0.076	0.076		0.08	0.078	0.079		0.078	0.081	0.084		DMSO	0.0753333	13.1624	14.188	14.188		0.079	15.9574	14.8936	15.4255		0.081	23.7705	26.2295	28.6885	DMSO	15.2601	0.00352767	16.7088	0.0129615	21.4996	0.00863777
G	0.048	0.048	0.049		0.052	0.049	0.049		0.049	0.049	0.049		blank	0.0483333					0.05					0.049
H
Absorbance	1	2	3	4	5	6	7	8	9	10	11	12		mean (abs)	1				mean (abs)	2				mean (abs)	β-sitosterol
A	0.23	0.24	0.238		0.226	0.255	0.217		0.23	0.22	0.229		0	0.236	96.7684	102.154	101.077		0.232667	96.3437	112.249	91.4077		0.226333	102.072	96.4218	101.507
B	0.291	0.264	0.263		0.301	0.291	0.26		0.272	0.254	0.274		0.1	0.272667	129.623	115.081	114.542		0.284	135.009	131.993	114.991		0.266667	125.8	115.631	126.93
C	0.276	0.325	0.312		0.304	0.333	0.326		0.338	0.374	0.367		1	0.304333	121.544	147.935	140.934		0.321	136.625	155.027	151.188		0.359667	163.089	183.427	179.473
D	0.258	0.288	0.272		0.259	0.233	0.237		0.257	0.233	0.24		10	0.272667	111.849	128.007	119.39		0.243	112.388	100.183	102.377		0.243333	117.326	103.766	107.721
E	0.087	0.079	0.079		0.08	0.08	0.081		0.088	0.09	0.087		100	0.0816667	19.7487	15.4399	15.4399		0.0803333	15.9785	16.2706	16.819		0.0883333	21.8456	22.9755	21.2806
F	0.081	0.076	0.077		0.081	0.079	0.08		0.083	0.087	0.087		DMSO	0.078	16.5171	13.8241	14.3627		0.08	16.5171	15.7221	16.2706		0.0856667	19.0207	21.2806	21.2806
G	0.049	0.051	0.051		0.052	0.05	0.049		0.049	0.049	0.05		blank	0.0503333					0.0503333					0.0493333
H

## Sheet:  Crude extracts 3 replicates
Crude extracts
Absorbance (abs)	1	2	3	4	5	6	7	8	9	10	11	12			mean (abs)	4				mean (abs)	5				mean (abs)	Crude extracts
A	0.258	0.275	0.281		0.17	0.182	0.193		0.132	0.125	0.107				0.271333	93.6709	101.741	104.589		0.181667	90.3315	100.276	109.392	0	0.121333	117.297	105.946	76.7568
B	0.294	0.274	0.284		0.244	0.252	0.287		0.16	0.182	0.165				0.284	110.759	101.266	106.013		0.261	151.657	158.287	187.293	0.1	0.169	170.811	198.378	170.811
C	0.209	0.212	0.223		0.244	0.253	0.293		0.232	0.225	0.212				0.214667	70.4114	71.8354	77.057		0.263333	151.657	159.116	192.265	1	0.223	247.027	268.108	247.027
D	0.216	0.233	0.193		0.299	0.268	0.291		0.162	0.18	0.183				0.214	73.7342	81.8038	62.8165		0.286	197.238	171.547	190.608	10	0.175	200	195.135	200
E	0.243	0.257	0.249		0.148	0.156	0.153		0.171	0.187	0.174				0.249667	86.5506	93.1962	89.3987		0.152333	72.0994	78.7293	76.2431	100	0.177333	185.405	206.486	185.405
F	0.137	0.114	0.12		0.097	0.096	0.095		0.124	0.114	0.119				0.123667	36.2342	25.3165	28.1646		0.096	29.8343	29.0055	28.1768	1000	0.119	96.2162	88.1081	96.2162
G	0.077	0.071	0.077		0.079	0.088	0.095		0.075	0.077	0.081				0.075	7.75316	4.90506	7.75316		0.0873333	14.9171	22.3757	28.1768	10000	0.0776667	34.5946	28.1081	34.5946
H	0.061	0.061	0.06		0.064	0.06	0.059		0.059	0.06	0.06				0.0606667					0.061				blank	0.0596667
																															unknown 4		unknown 5		Crude extracts
Absorbance (abs)	1	2	3	4	5	6	7	8	9	10	11	12			mean (abs)	4				mean (abs)	5				mean (abs)	Crude extracts					%cell via	sd (abs)	%cell via	sd (abs)	% cell viability	sd (abs)
A	0.255	0.261	0.288		0.294	0.288	0.299		0.215	0.23	0.219				0.268	94.0819	96.8134	109.105		0.293667	100.137	97.6744	102.189	0	0.221333	96.325	105.029	98.646		0	100	0.0320039	100	0.0542241	100	0.0638092
B	0.283	0.294	0.28		0.424	0.478	0.496		0.283	0.298	0.295				0.285667	106.829	111.836	105.463		0.466	153.488	175.65	183.037	0.1	0.292	135.783	144.487	142.747		0.1	135.731	0.0389982	150.481	0.094946	147.928	0.0731114
C	0.401	0.414	0.394		0.423	0.443	0.437		0.296	0.302	0.274				0.403	160.546	166.464	157.36		0.434333	153.078	161.286	158.824	1	0.290667	143.327	146.809	130.561		1	145.546	0.0884166	146.066	0.0783376	176.047	0.0500475
D	0.387	0.398	0.351		0.333	0.349	0.308		0.333	0.346	0.31				0.378667	154.173	159.181	137.785		0.33	116.142	122.709	105.882	10	0.329667	164.797	172.34	151.451		10	128.373	0.0734906	133.113	0.0342162	166.54	0.0829198
E	0.376	0.3	0.373		0.259	0.264	0.232		0.289	0.33	0.31				0.349667	149.165	114.568	147.8		0.251667	85.7729	87.8249	74.6922	100	0.309667	139.265	163.056	151.451		100	134.328	0.0512421	77.3335	0.0447856	150.185	0.0611442
F	0.098	0.109	0.129		0.092	0.099	0.096		0.131	0.109	0.104				0.112	22.61	27.6176	36.7223		0.0956667	17.2367	20.1094	18.8782	1000	0.114667	47.5822	34.8162	31.9149		1000	31.6877	0.0152315	21.0029	0.00570088	53.337	0.00915302
G	0.075	0.072	0.079		0.084	0.076	0.076		0.083	0.08	0.069				0.0753333	12.1396	10.7739	13.9605		0.0786667	13.9535	10.6703	10.6703	10000	0.0773333	19.7292	17.9884	11.6054		10000	11.5626	0.00323179	15.4595	0.00627384	20.8673	0.00407567
H	0.048	0.048	0.049		0.052	0.049	0.049		0.049	0.049	0.049				0.0483333					0.05				blank	0.049					DMSO	15.2601	0.00352767	16.7088	0.0129615	21.4996	0.00863777
Absorbance (abs)	1	2	3	4	5	6	7	8	9	10	11	12			mean (abs)	4				mean (abs)	5				mean (abs)	Crude extracts
A	0.225	0.202	0.205		0.289	0.294	0.256		0.275	0.25	0.264				0.210667	108.94	94.5946	96.4657		0.279667	104.07	106.25	89.6802	0	0.263	105.616	93.9158	100.468
B	0.348	0.353	0.379		0.3	0.325	0.317		0.272	0.377	0.286				0.36	185.655	188.773	204.99		0.314	108.866	119.767	116.279	0.1	0.311667	104.212	153.354	110.764
C	0.387	0.358	0.378		0.317	0.319	0.291		0.33	0.347	0.329				0.374333	209.979	191.892	204.366		0.309	116.279	117.151	104.942	1	0.335333	131.357	139.314	130.889
D	0.309	0.319	0.302		0.319	0.251	0.255		0.348	0.366	0.321				0.31	161.331	167.568	156.965		0.275	117.151	87.5	89.2442	10	0.345	139.782	148.206	127.145
E	0.329	0.336	0.333		0.218	0.215	0.224		0.273	0.292	0.268				0.332667	173.805	178.17	176.299		0.219	73.1105	71.8023	75.7267	100	0.277667	104.68	113.573	102.34
F	0.091	0.106	0.128		0.088	0.083	0.085		0.116	0.111	0.103				0.108333	25.3638	34.7193	48.4407		0.0853333	16.4244	14.2442	15.1163	1000	0.11	31.2012	28.8612	25.117
G	0.074	0.072	0.08		0.082	0.079	0.078		0.078	0.078	0.08				0.0753333	14.7609	13.5135	18.5031		0.0796667	13.8081	12.5	12.064	10000	0.0786667	13.4165	13.4165	14.3526
H	0.049	0.051	0.051		0.052	0.05	0.049		0.049	0.049	0.05				0.0503333					0.0503333				blank	0.0493333

## Sheet:  IC50 values
Concentration	unknown 1		unknown 2		β-sitosterol		concentration	unknown 1	unknown 2	β-sitosterol
	%cell via	sd (abs)	%cell via	sd (abs)	% cell via	sd (abs)	(µg/ml)	cell mortality	cell mortality	cell mortality
0	100	0.0352247	100	0.0177255	100	0.0546339	0	0	0	0
0.1	130.818	0.0644787	112.466	0.0240156	140.193	0.0577778	0.1	-30.8177	-12.4657	-40.1931
1	134.258	0.0361528	126.705	0.0263808	189.663	0.107228	1	-34.2583	-26.7048	-89.6627
10	118.695	0.023635	98.1258	0.0256894	114.884	0.0611019	10	-18.6952	1.87425	-14.884
100	17.4976	0.00884747	12.8163	0.003444	36.8602	0.00925263	100	82.5024	87.1837	63.1398
							IC50	69.8399	62.4121	86.4221
Concentration	unknown 4		unknown 5		Crude extracts		concentration	unknown 4	unknown 5	Crude extracts
	%cell via	sd (abs)	%cell via	sd (abs)	% cell via	sd (abs)	(µg/ml)	cell mortality	cell mortality	cell mortality
0	100	0.0320039	100	0.0542241	100	0.0638092	0	0	0	0
0.1	135.731	0.0389982	150.481	0.094946	147.928	0.0731114	0.1	-35.7315	-50.4806	-47.9276
1	145.546	0.0884166	146.066	0.0783376	176.047	0.0500475	1	-45.5457	-46.0665	-76.0465
10	128.373	0.0734906	133.113	0.0342162	166.54	0.0829198	10	-28.3728	-33.1134	-66.5395
100	134.328	0.0512421	77.3335	0.0447856	150.185	0.0611442	100	-34.3281	22.6665	-50.1847
1000	31.6877	0.0152315	21.0029	0.00570088	53.337	0.00915302	1000	68.3123	78.9971	46.663
10000	11.5626	0.00323179	15.4595	0.00627384	20.8673	0.00407567	10000	88.4374	84.5405	79.1327
							IC50	5932.88	5784.86	7027.13

## Sheet: Conclusion for publication
	concentration	β-sitosterol
	(µg/ml)	cell mortality
	0	0
	0.1	-40.1931
	1	-89.6627
	10	-14.884
	100	63.1398
	IC50	86.4221
	concentration	crude
	(µg/ml)	cell mortality
	0	0
	0.1	-47.9276
	1	-76.0465
	10	-66.5395
	100	-50.1847
	1000	46.663
	10000	79.1327
	IC50	7027.13
		β-sitosterol
	Concentration (µg/ml)	%cell via	sd (abs)
	0	100	0.0546339
	0.1	140.193	0.0577778
	1	189.663	0.107228
	10	114.884	0.0611019
	100	36.8602	0.00925263
	DMSO	21.4996	0.00863777
		Crude extracts
		%cell via	sd (abs)
	0	100	0.0638092
	0.1	147.928	0.0731114
	1	176.047	0.0500475
	10	166.54	0.0829198
	100	150.185	0.0611442
	1000	53.337	0.00915302
	10000	20.8673	0.00407567
	DMSO	21.4996	0.00863777
